## ERRATA

Errata on "A Mixture Model for Unidirectionally Fiber-Reinforced Composites," by H. Murakami and G. A. Hegemier, and published in the December 1986 issue of the ASME JOURNAL OF APPLIED MECHANICS, Vol. 53, pp. 765-773.

Equation (42b) should be read as

$$\beta_2 = \beta_3 = 1 / \left\{ \sum_{\alpha=1}^2 h^{(\alpha)} (\lambda + 3\mu)^{(\alpha)} / 8\mu^{(\alpha)} (\lambda + \mu)^{(\alpha)} \right\}. \quad (42b)$$

Similarly, equation (43g) should be corrected to

$$M_{31}^2 = M_{12}^3 = 0, \quad M_{23}^2 = \frac{h}{4} P_3, \quad M_{23}^3 = \frac{h}{4} P_2. \quad (43g)$$
